# Supplementary material for: Electronic and optical properties of single crystal SnS2: an earth-abundant disulfide photocatalyst
Source: Royal Society of Chemistry journal article supplement (doi:10.1039/c5ta08214e), 2015-12-11
Supplement: c5ta08214e1.pdf [file c5ta08214e1.pdf]

Cite this: DOI: 10.1039/xxxxxxxxxx

## Electronic and optical properties of single crystal SnS<sub>2</sub>: an earth-abundant disulfide photocatalyst.<sup>†</sup>

Lee A. Burton,<sup>\*a</sup> Thomas J. Whittles,<sup>b</sup> David Hesp,<sup>b</sup> Wojciech M. Linhart,<sup>b</sup> Jonathan M. Skelton,<sup>c</sup> Bo Hou,<sup>d</sup> Richard Webster,<sup>e</sup> Graeme O'Dowd,<sup>b</sup> Christian Reece,<sup>f</sup> David Cherns,<sup>e</sup> David J. Fermin,<sup>g</sup> Tim D. Veal,<sup>b</sup> Vin R. Dhanak,<sup>b</sup> and Aron Walsh<sup>c,h</sup>

### 1 Supporting Information

Figure 1 of Supporting Information shows the obtained single crystal X-ray diffraction pattern and the matched sample pattern for this case. The pattern determines the standard hexagonal crystal structure with *P-3m1* symmetry (space group 164) corresponding to the ground state 2H polytype with the lattice constants  $a = 3.649 \text{ \AA}$  and  $c = 5.899 \text{ \AA}$ . We note that the 4H SnS<sub>2</sub> structure has a major (0113) peak at 34°, which we do not see.

Figure 2 shows the first order Laue zone (FOLZ) obtained for the single crystals of SnS<sub>2</sub> at two different contrast settings. The reader is invited to discern the absence of any inner ring formation that would be indicative of polytype impurities in these crystals.

Figure 3 shows the XPS spectrum for the SnS<sub>2</sub> crystals. It is possible to see that very few impurity peaks exist with the exception of relatively small adventitious carbon and oxygen peaks present.

Finally, Figure 4 shows the optical absorption spectra as a function of temperature from Fourier transform infra-red spectrophotometry (FTIR). This figure contains the absorption data plotted as  $\alpha^{1/2}$  versus photon energy for indirect gaps, alongside extrapolation to absorption onsets for the temperatures as labelled.

The authors conclude that the analysis performed in this work successfully corresponds to the physical properties of the ground state 2H polytype of SnS<sub>2</sub>.

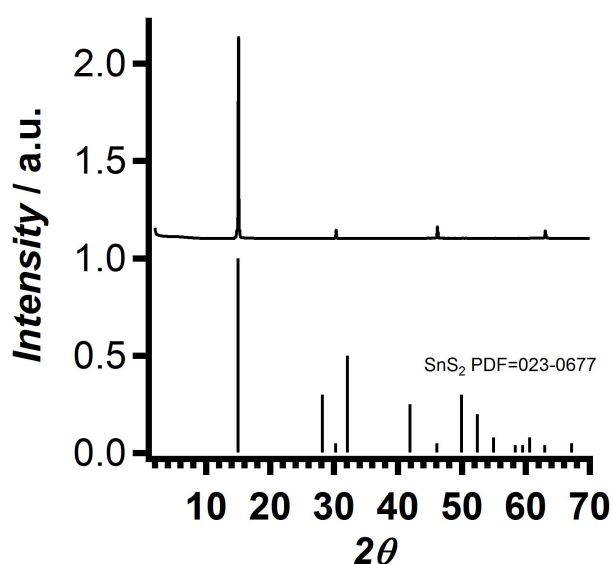

Fig. 1 Single crystal XRD of SnS<sub>2</sub> (top) and the corresponding structure match (bottom).

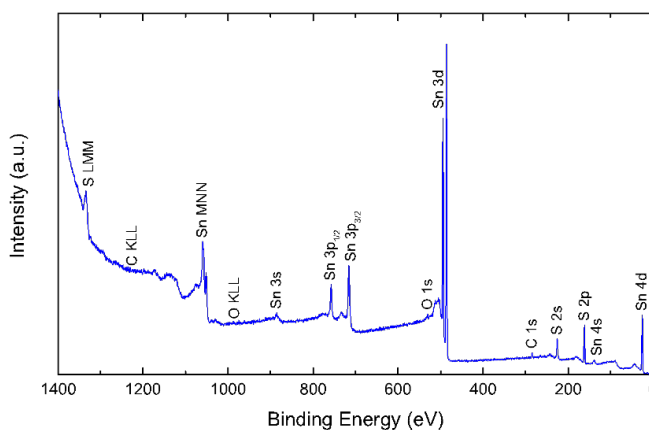

Fig. 3 XPS spectrum for the SnS<sub>2</sub> crystals. Characteristic peaks for Sn and S are present with only minimal adventitious carbon and oxygen contamination.

<sup>a</sup> Materials and Structures Laboratory, Tokyo Institute of Technology, 4259 R3-7 Nagatsuta, Midori-ku, Yokohama 226-8503, Japan. Tel: 045-924-5345; E-mail: burton.l.aa@m.titech.ac.jp

<sup>b</sup> Stephenson Institute for Renewable Energy and Department of Physics, University of Liverpool, Liverpool, L69 7ZE, UK.

<sup>c</sup> Centre for Sustainable Chemical Technologies, Department of Chemistry, University of Bath, Bath, BA2 7AY UK.

<sup>d</sup> Department of Engineering Science, University of Oxford, Parks Road, Oxford OX1 3PJ, UK.

<sup>e</sup> School of Physics, HH Wills Physics Laboratory, University of Bristol, Tyndall Avenue, Bristol, BS8 1TL, UK.

<sup>f</sup> School of Chemistry, Cardiff University, Park Place, Cardiff CF10 3AT, UK.

<sup>g</sup> School of Chemistry, University of Bristol, Cantocks Close, Bristol, BS8 1TS, UK.

<sup>h</sup> Global E<sup>3</sup> Institute and Department of Materials Science and Engineering, Yonsei University, Seoul 120-749, Korea

<sup>†</sup> Electronic Supplementary Information (ESI) available: [details of any supplementary information available should be included here]. See DOI: 10.1039/b000000x/

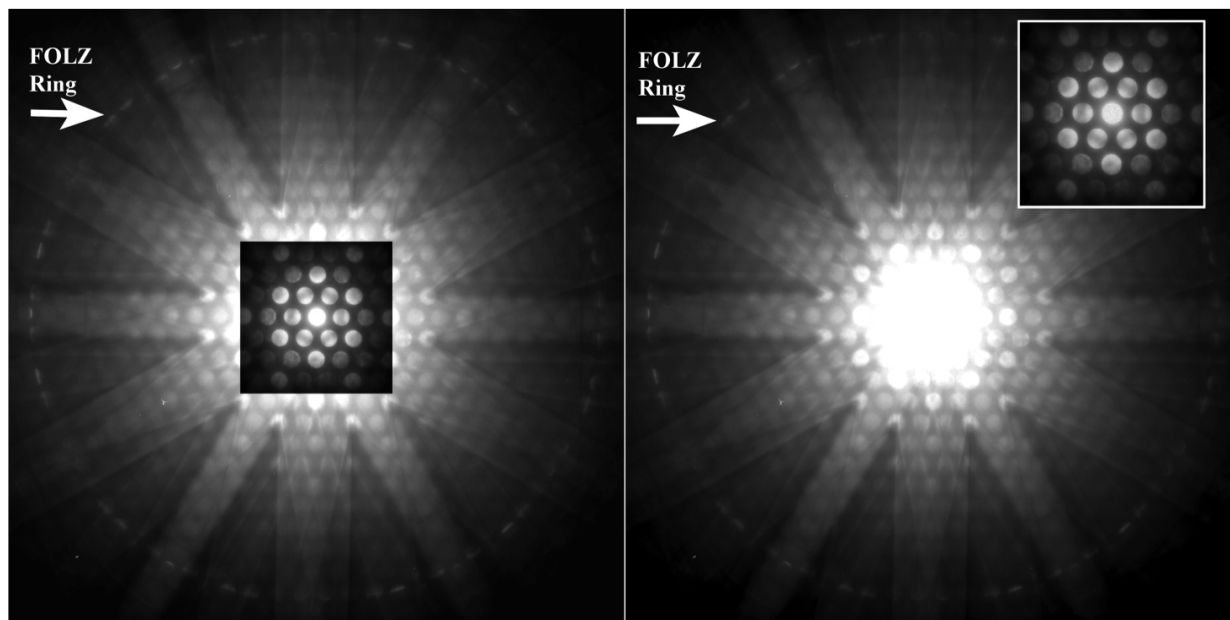

**Fig. 2** TEM diffraction patterns for a selected area electron diffraction in the [0001] direction of SnS<sub>2</sub>. Two different contrast settings are shown to highlight the absence of inner Laue rings, associated with phase impurities. The FOLZ ring associated with 2H polytype of tin disulfide is highlighted.

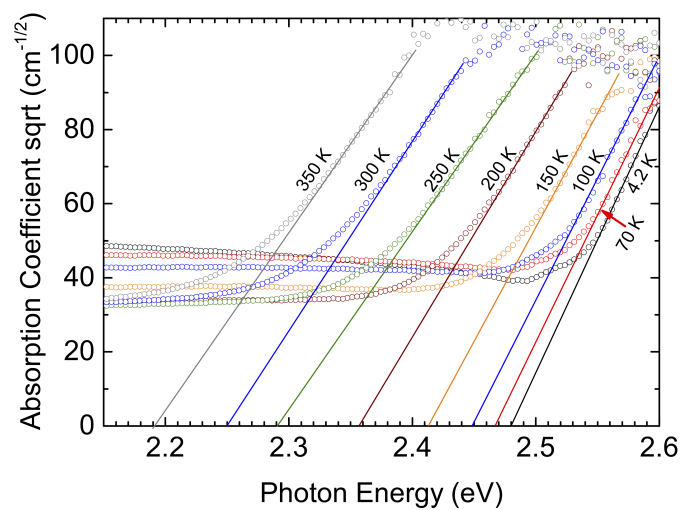

**Fig. 4** Optical absorption spectra as a function of temperature containing the absorption data plotted as  $\alpha^{1/2}$  versus photon energy.
